# Supplementary material for: Genetically engineered SCN5A mutant pig hearts exhibit conduction defects and arrhythmias
Source: JCI journal article supplement (doi:10.1172/jci76919), 2014-12-14
Supplement: sd1 [file 1]

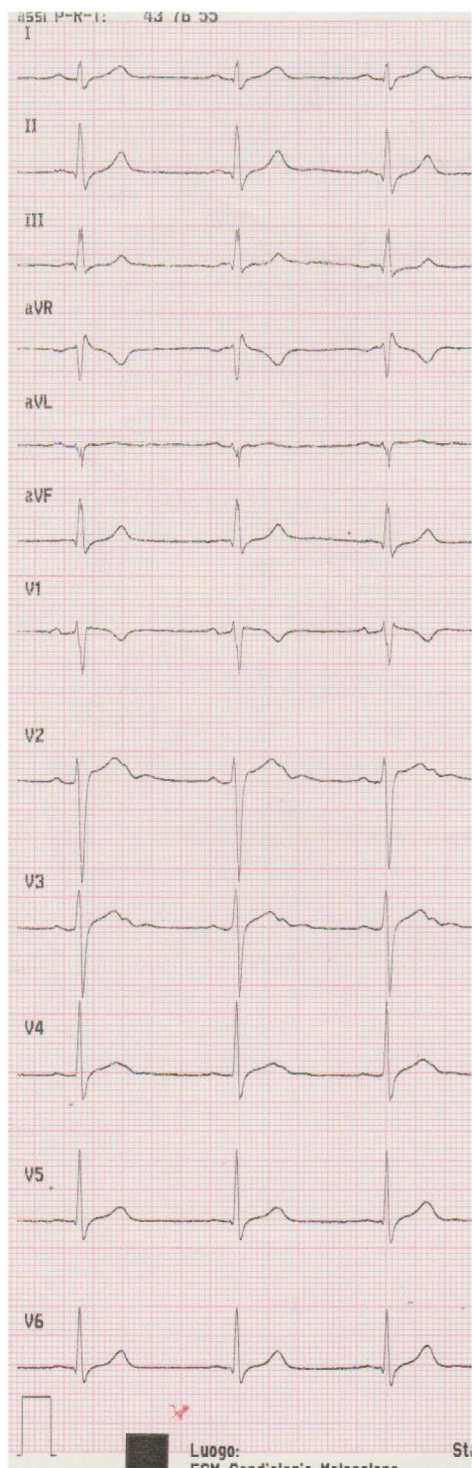

**Supplemental Figure 1.** 12-lead electrocardiogram of 10 year-old Brugada patient harboring the SCN5A<sup>E555X/+</sup> mutation.

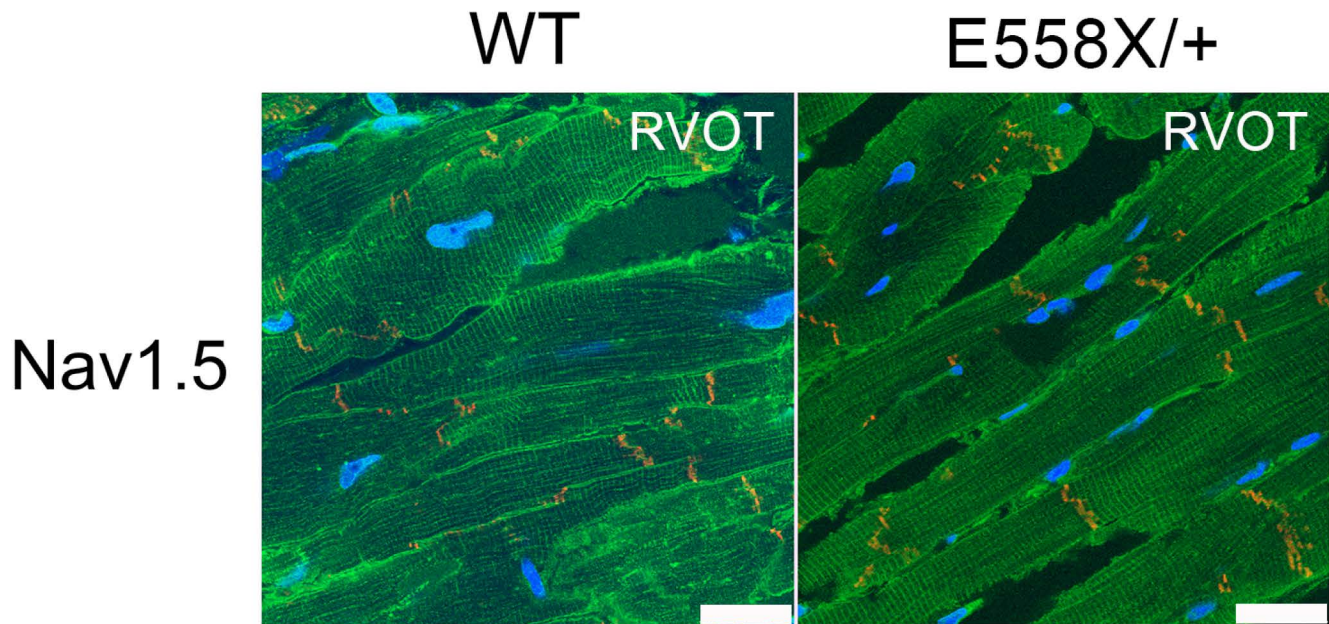

**Supplemental Figure 2.** Representative immunostaining of  $\text{Na}_v1.5$  (green) and N-Cadherin (red) from cryopreserved RVOT sections of WT and  $\text{SCN5A}^{\text{E558X/+}}$  hearts. Nuclei were stained with DAPI (blue). Scale bar=25 $\mu\text{m}$ .

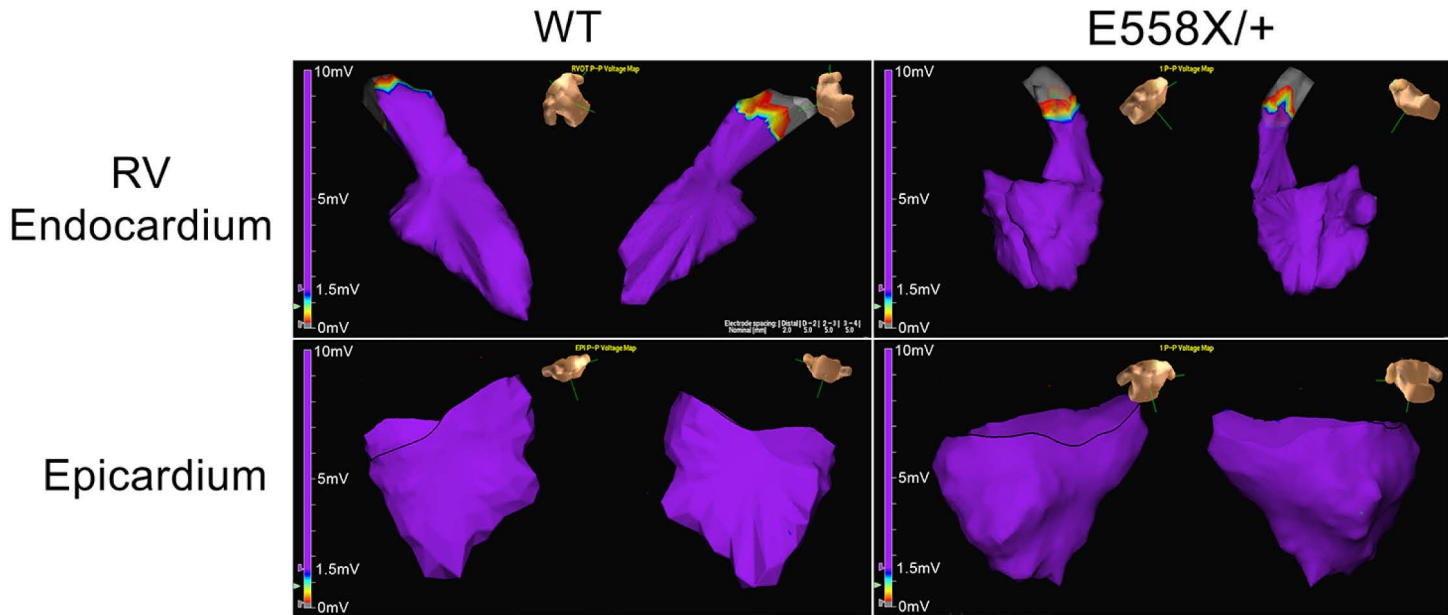

**Supplemental Figure 3.** Representative RVOT endocardial and epicardial voltage maps of WT and *SCN5A*<sup>E558X/+</sup> hearts. Low voltage electrograms were defined as bipolar signals below 1.5mV in peak-to-peak amplitude.

**A**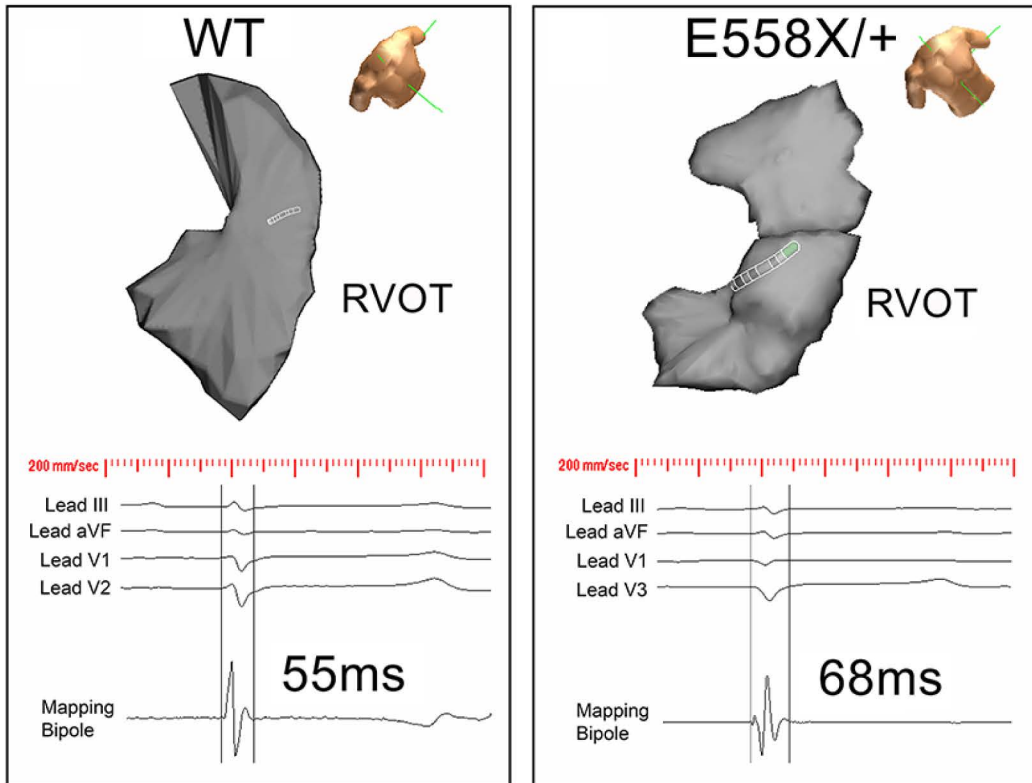**B**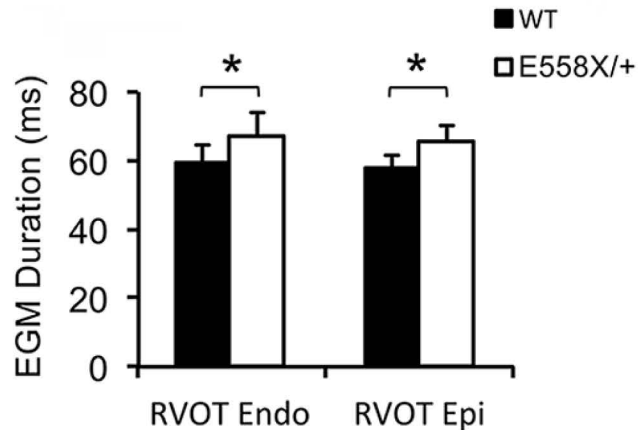

**Supplemental Figure 4.** A) Representative bipolar electrogram recordings from the RVOT endocardial surface of WT and *SCN5A*<sup>E558X/+</sup> hearts. B) Average bipolar electrogram (EGM) durations (N=10 recordings from each region) recorded from RVOT endocardial and epicardial surfaces of WT (n=3, age 22±1 months) and mutant (n=3, age 22±1 months) pigs, \*p<0.00002.

**A**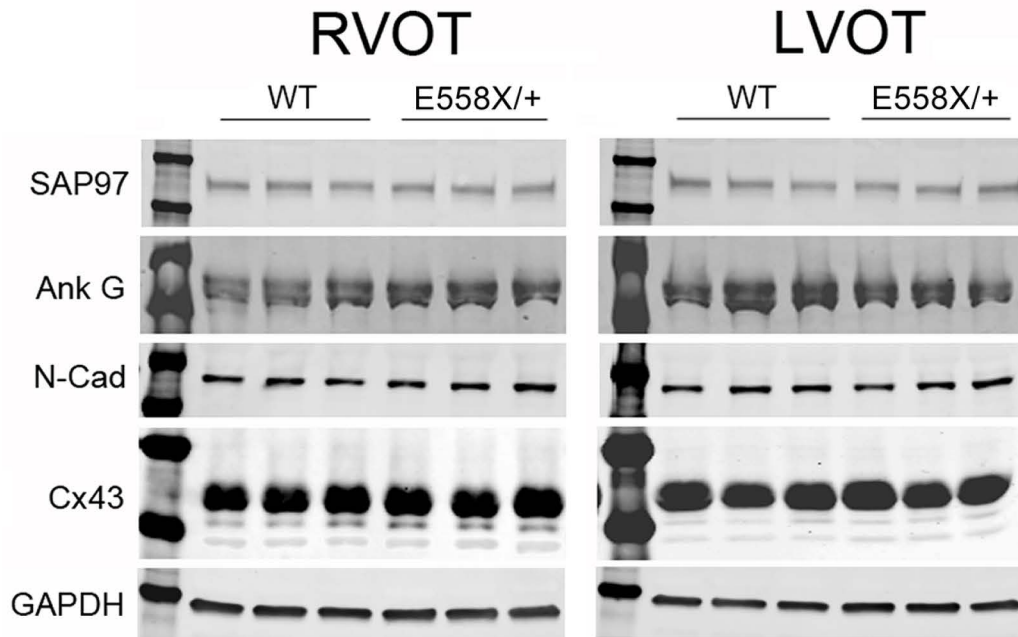**B**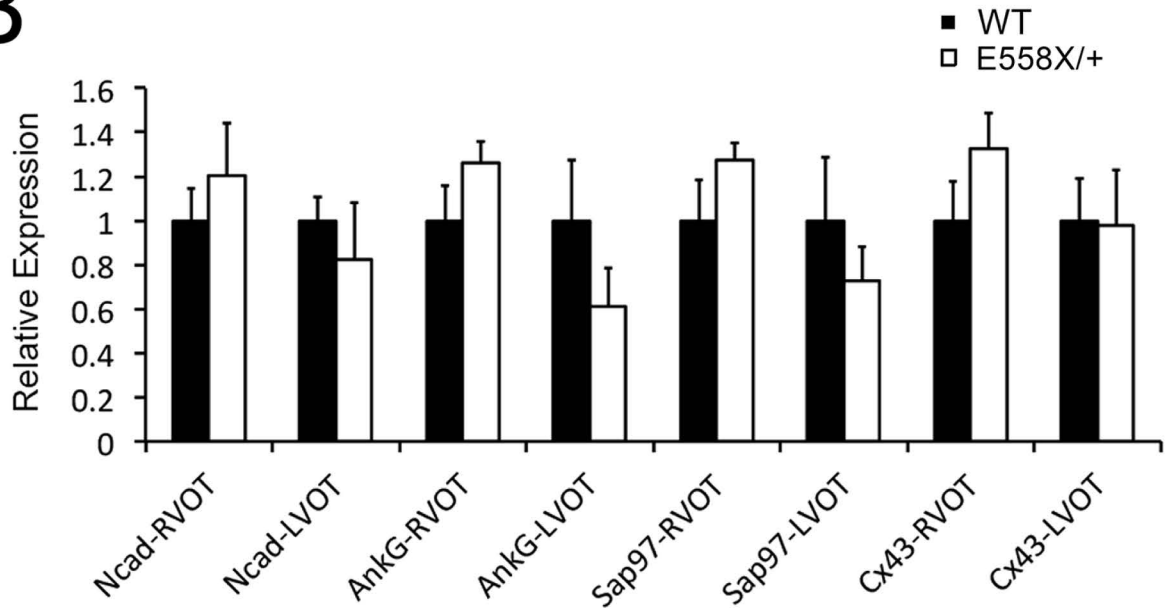

**Supplemental Figure 5.** A) Western blot analysis of Na<sub>v</sub>1.5-associated proteins in WT and *SCN5A*<sup>E558X/+</sup> RVOT and LVOT. B) Quantitative analysis using densitometry demonstrated no significant difference in protein expression levels of voltage-gated sodium channel associated proteins.

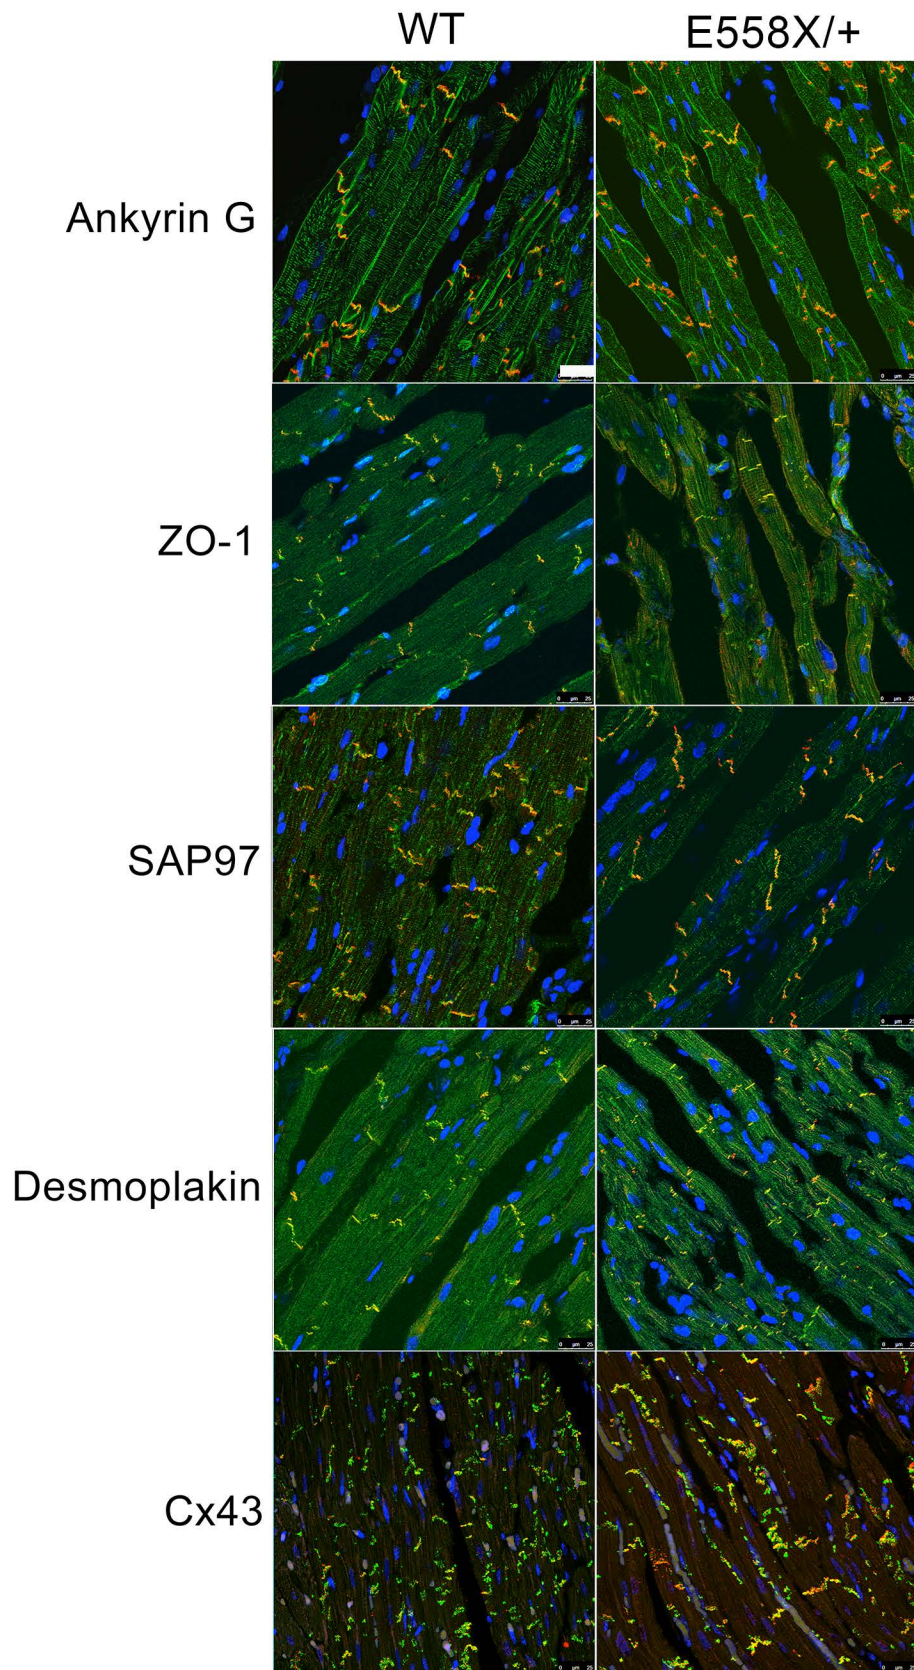

**Supplemental Figure 6.** Representative staining patterns of  $\text{Na}_v1.5$ -associated proteins (green) and N-Cadherin (red) from cryopreserved RVOT sections of WT and  $\text{SCN5A}^{\text{E558X/+}}$  hearts. Nuclei were stained with DAPI (blue). Scale bar = 25 $\mu\text{m}$ .

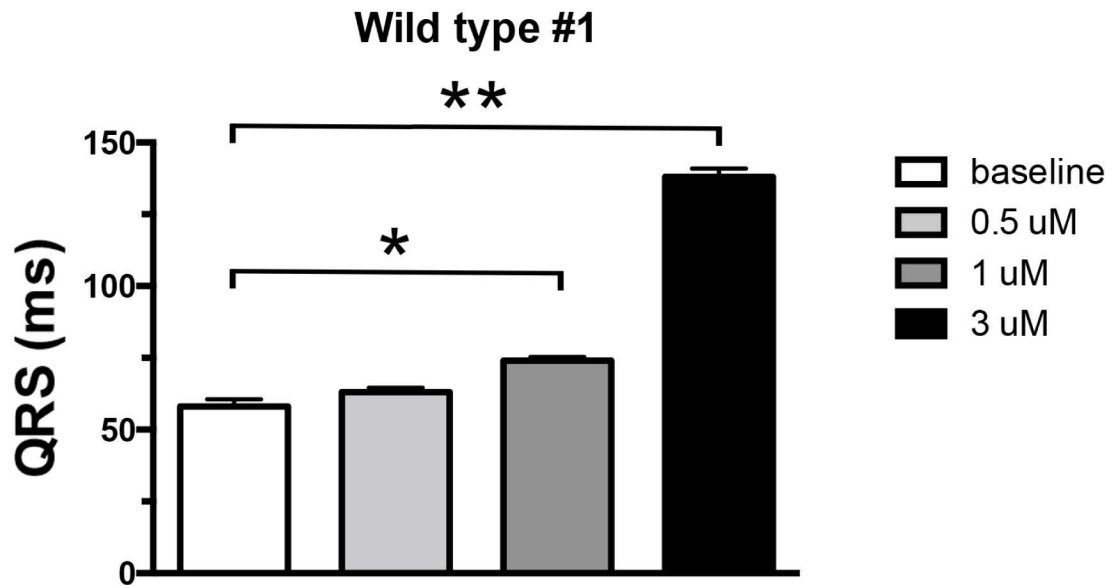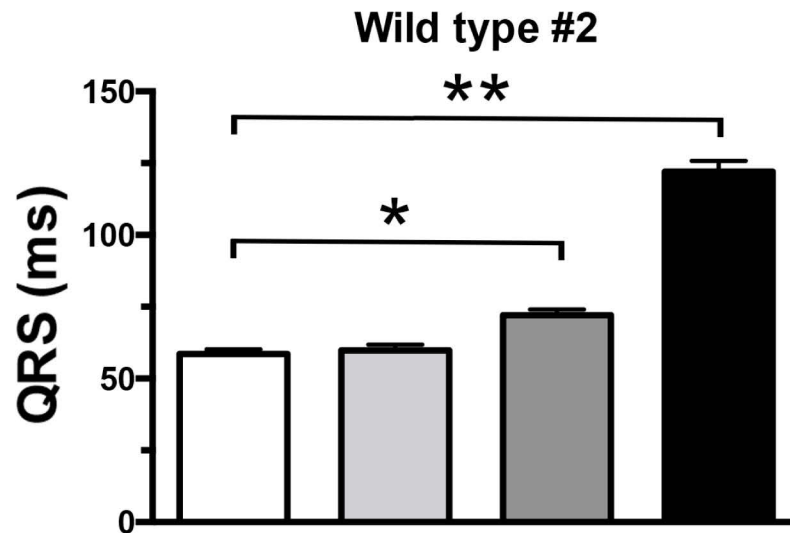

**Supplemental Figure 7.** Langendorff-perfused WT hearts (n=2, age 19 months) at 39°C (Protocol #1) were challenged with low (0.5µM), intermediate(1µM), and high-doses of flecainide (up to 3µM), which resulted in significant QRS prolongation. (\*p=0.01, \*\*p<0.001)

WT v *SCN5A*<sup>E558X/+</sup> p=N.S. for all values

| Genotype                        | LVEDD<br>(cm) | LVESD<br>(cm) | FS (%)  | LVPWd<br>(cm) | LVPWs<br>(cm) | LVSD<br>(cm) | LVSs<br>(cm) | RVOTd<br>(cm) | RVIFd<br>(cm) |
|---------------------------------|---------------|---------------|---------|---------------|---------------|--------------|--------------|---------------|---------------|
| Wildtype                        | 4.27±0.21     | 3.08±0.16     | 28±0.87 | 1.07±0.04     | 1.55±0.06     | 1.02±0.03    | 1.58±0.03    | 2.54±0.04     | 2.37±0.14     |
| <i>SCN5A</i> <sup>E558X/+</sup> | 4.36±0.26     | 3.17±0.24     | 27±1.52 | 1.06±0.02     | 1.56±0.05     | 1.04±0.03    | 1.51±0.10    | 2.52±0.04     | 2.29±0.14     |

**Supplemental Table 1.** Transthoracic echocardiography of WT and *SCN5A*<sup>E558X/+</sup> pigs.
